# Supplementary material for: The Effects of Composite Alkali-Stored Spent Hypsizygus marmoreus Substrate on Carcass Quality, Rumen Fermentation, and Rumen Microbial Diversity in Goats
Source: MDPI journal article supplement (doi:10.3390/ani14010166), 2024-01-04
Supplement: s1 [file s1]

# The Effects of Composite Alkali-Stored Spent *Hypsizygus marmoreus* Substrate (SHMS) on Carcass Quality, Rumen Fermentation, and Rumen Microbial Diversity in Goats

## Supplementary Materials:

Table S1. *Hypsizygus marmoreus* medium and the nutritional components of the mushroom bran (DM basis, %) .

| Medium formulation / % |        | Nutrient composition    |       |
|------------------------|--------|-------------------------|-------|
| Cottonseed hull        | 50.00  | Dry matter              | 94.85 |
| Corn cob               | 10.00  | Ether extract           | 1.82  |
| Wheat bran             | 10.00  | Crude protein           | 13.16 |
| Bagasse                | 10.00  | Acid detergent fiber    | 41.84 |
| Sawdust                | 10.00  | Neutral detergent fiber | 54.75 |
| Soybean meal           | 5.00   | Acid detergent lignin   | 17.26 |
| Corn                   | 5.00   |                         |       |
| Total                  | 100.00 |                         |       |

Table S2. Report on Pesticide Residues, Heavy Metal Residues and Aflatoxin Residues in *Pleurotus ostreatus*

| Items                                                                  | Results           |
|------------------------------------------------------------------------|-------------------|
| C <sub>9</sub> H <sub>9</sub> N <sub>3</sub> O <sub>2</sub> /(mg/kg)   | Undetected (<0.1) |
| C <sub>22</sub> H <sub>22</sub> NO <sub>3</sub> /(mg/kg)               | Undetected (<0.1) |
| C <sub>2</sub> H <sub>8</sub> NO <sub>2</sub> PS/(mg/kg)               | Undetected (<0.1) |
| C <sub>4</sub> H <sub>7</sub> Cl <sub>2</sub> O <sub>4</sub> P/(mg/kg) | Undetected (<0.1) |
| C <sub>4</sub> H <sub>8</sub> Cl <sub>3</sub> O <sub>4</sub> P/(mg/kg) | Undetected (<0.1) |
| C <sub>6</sub> H <sub>6</sub> Cl <sub>6</sub> /(mg/kg)                 | Undetected (<0.1) |
| C <sub>13</sub> H <sub>9</sub> Cl <sub>15</sub> /(mg/kg)               | Undetected (<0.1) |
| Pb/(mg/kg)                                                             | Undetected        |
| As/(mg/kg)                                                             | Undetected        |
| Hg/(mg/kg)                                                             | Undetected        |
| Cd/(mg/kg)                                                             | Undetected        |
| Cr/(mg/kg)                                                             | Undetected        |
| B <sub>1</sub> /(μg/kg)                                                | Undetected        |
